# Supplementary material for: AhR Antagonist Promotes Differentiation of Papillary Thyroid Cancer via Regulating circSH2B3/miR-4640-5P/IGF2BP2 Axis
Source: Front Pharmacol. 2021 Dec 23;12:795386. doi: 10.3389/fphar.2021.795386 (PMC8733664; doi:10.3389/fphar.2021.795386)
Supplement: Supplementary file 1 [file Table2.xls]

## Sheet: K1_SR1-vs-K1_control-diff-pval-
circRNA_id
circRNA_0290|Chr1:66891154_66905375_-
circRNA_0638|Chr1:219193130_219218712_+
circRNA_0666|Chr1:224952670_225007544_+
circRNA_0772|Chr10:863743_885760_-
circRNA_1406|Chr11:73707420_73718890_-
circRNA_2314|Chr14:65561337_65629606_+
circRNA_2817|Chr16:16007816_16102717_+
circRNA_2978|Chr16:85633914_85634132_+
circRNA_3331|Chr18:196637_199316_+
circRNA_4043|Chr2:121757240_121761524_+
circRNA_4101|Chr2:168691034_168717978_+
circRNA_4355|Chr2:229858772_229860531_-
circRNA_4496|Chr20:35653528_35659014_-
circRNA_4674|Chr21:41226266_41257326_+
circRNA_5049|Chr3:98881540_98892606_-
circRNA_5093|Chr3:124773690_124859446_-
circRNA_5360|Chr3:196487399_196488683_-
circRNA_6421|Chr6:116645714_116660846_-
circRNA_6586|Chr7:17845595_17850964_-
circRNA_6730|Chr7:77581427_77600806_+
circRNA_6870|Chr7:129014979_129018157_-
circRNA_7411|Chr9:37424845_37426654_+
circRNA_7542|Chr9:111570091_111586165_-
circRNA_0060|Chr1:15717893_15721388_+
circRNA_0105|Chr1:23030469_23050520_+
circRNA_0262|Chr1:53594108_53600278_-
circRNA_0587|Chr1:200760839_200815644_+
circRNA_0825|Chr10:15833630_15847943_-
circRNA_1321|Chr11:46493608_46508370_-
circRNA_1887|Chr12:111418119_111418877_+
circRNA_2389|Chr14:96833467_96860735_+
circRNA_4565|Chr20:48953556_48963898_+
circRNA_4619|Chr21:15014344_15043574_-
circRNA_4790|Chr22:42516011_42577098_-
circRNA_4818|Chr3:3777725_3789074_-
circRNA_5121|Chr3:130930416_130941699_+
circRNA_5410|Chr4:1900626_1918623_+
circRNA_5790|Chr5:38523419_38530666_-
circRNA_5884|Chr5:73058433_73077493_+
circRNA_5956|Chr5:94643273_94654752_+
circRNA_6322|Chr6:75634707_75670720_+
circRNA_6687|Chr7:66127704_66134374_+
circRNA_7248|Chr8:140739018_140752316_-
circRNA_7469|Chr9:92256680_92269983_-
