# Supplementary material for: AhR Antagonist Promotes Differentiation of Papillary Thyroid Cancer via Regulating circSH2B3/miR-4640-5P/IGF2BP2 Axis
Source: Front Pharmacol. 2021 Dec 23;12:795386. doi: 10.3389/fphar.2021.795386 (PMC8733664; doi:10.3389/fphar.2021.795386)
Supplement: Supplementary file 4 [file Table1.xlsx]

## Sheet: Sheet1
hsa-miR-6720-5p-RT	CTCAACTGGTGTCGTGGAGTCGGCAATTCAGTTGAGCGCGGCGC
hsa-miR-6720-5p-S	ACACTCCAGCTGGGTTCCAGCCCTGGTAGGC
hsa-miR-1307-3p-RT	CTCAACTGGTGTCGTGGAGTCGGCAATTCAGTTGAGCACGACCG
hsa-miR-1307-3p-S	ACACTCCAGCTGGGACTCGGCGTGGCGTCG
hsa-miR-4731-5p-RT	CTCAACTGGTGTCGTGGAGTCGGCAATTCAGTTGAGCACACTCA
hsa-miR-4731-5p-S	ACACTCCAGCTGGGTGCTGGGGGCCACATG
hsa-miR-1278-RT	CTCAACTGGTGTCGTGGAGTCGGCAATTCAGTTGAGATAGATGA
hsa-miR-1278-S	ACACTCCAGCTGGGTAGTACTGTGCATATC
hsa-miR-4640-5p-RT	CTCAACTGGTGTCGTGGAGTCGGCAATTCAGTTGAGCCCACCAG
hsa-miR-4640-5p-S	ACACTCCAGCTGGGTGGGCCAGGGAGCAGCT
hsa-miR-146b-3p-RT	CTCAACTGGTGTCGTGGAGTCGGCAATTCAGTTGAGACCAGAAC
hsa-miR-146b-3p-S	ACACTCCAGCTGGGGCCCTGTGGACTCAGT
SLC5A5-S	CTGCCCCAGACCAGTACATGCC
SLC5A5-A	TGACGGTGAAGGAGCCCTGAAG
circSH2B3-S	CTGTGAGTTGCACGCCGTAG
circSH2B3-F	CAGAAGTAGCGCTGGAAGAGG
SH2B3-S	TTGAGATGCCTGACAACCTTTAC
SH2B3-F	GCTCTAGGGCTGAGGGAATATG
IGF2BP2-S	AACCCCAAAGAAGAAGTGAAGC
IGF2BP2-A	TTTGGTCACGAGGCACGAT
GAPDH-S	CATGAGAAGTATGACAACAGCCT-3
GAPDH-F	AGTCCTTCCACGATACCAAAGT
AhR-S	ATACAGAGTTGGACCGTTTGGC
AhR-A	CGTTTCTTTCAGTAGGGGAGGAT
